APRIL 2017 | VOLUME 174 | NUMBER 4

# The American Journal of Psychiatry

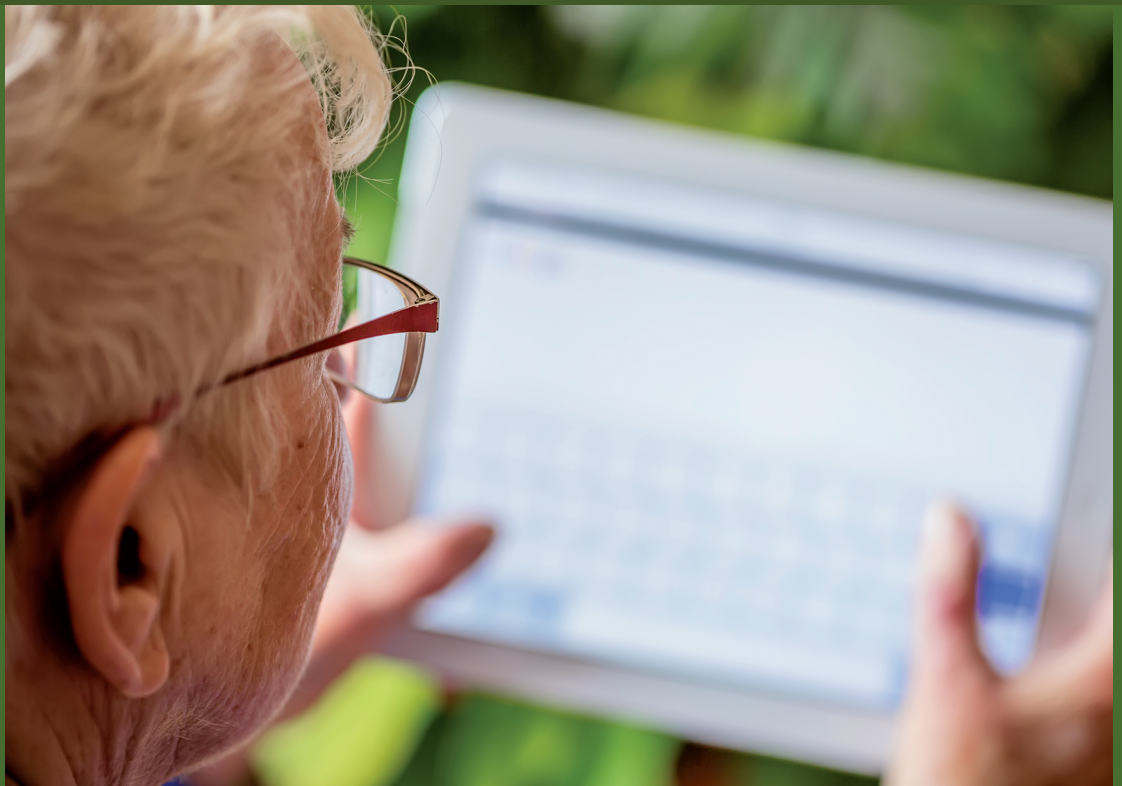

Computerized Cognitive Training in Older Adults  
With Mild Cognitive Impairment or Dementia

Caring for Syrian Refugees in Portland, Oregon

The Risk of Treatment-Emergent Mania With  
Methylphenidate in Bipolar Disorder

The Origins of Cognitive Deficits in Victimized Children:  
Implications for Neuroscientists and Clinicians

AMERICAN  
PSYCHIATRIC  
ASSOCIATION

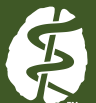

[ajp.psychiatryonline.org](http://ajp.psychiatryonline.org)
